# Supplementary material for: Potent Dopamine D2 Antagonists Block the Reward-Enhancing Effects of Nicotine in Smokers With Schizophrenia
Source: Oxford University Press journal article supplement (doi:10.1093/schbul/sby185), 2018-12-03
Supplement: sby185_suppl_supplementary_information.docx [file sby185_suppl_supplementary_information.docx]

Supplementary Figure 1

*Figure S1.* Discriminability in block 1 (“B1”) and block 2 (“B2”), prior to smoking and post-smoking, for the D2 antagonism + and D2 antagonism – groups. Bars show mean (±SEM).
